# Supplementary material for: Structural characterization of solvent-based food preparation of jellyfish
Source: Royal Society of Chemistry journal article supplement (doi:10.1039/d3sm00620d), 2023-12-08
Supplement: d3sm00620d1.pdf [file d3sm00620d1.pdf]

## Supplementary Material

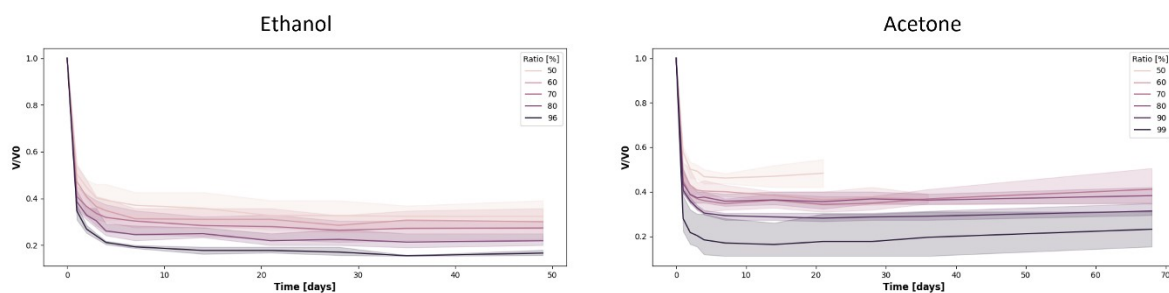

**Fig. S1 Volume swelling ratio of jellyfish in solvents.** The relative swelling ratio for the volume of jellyfish as a function of time (days) when soaked in various fractions of ethanol (left) and acetone (right) respectively.

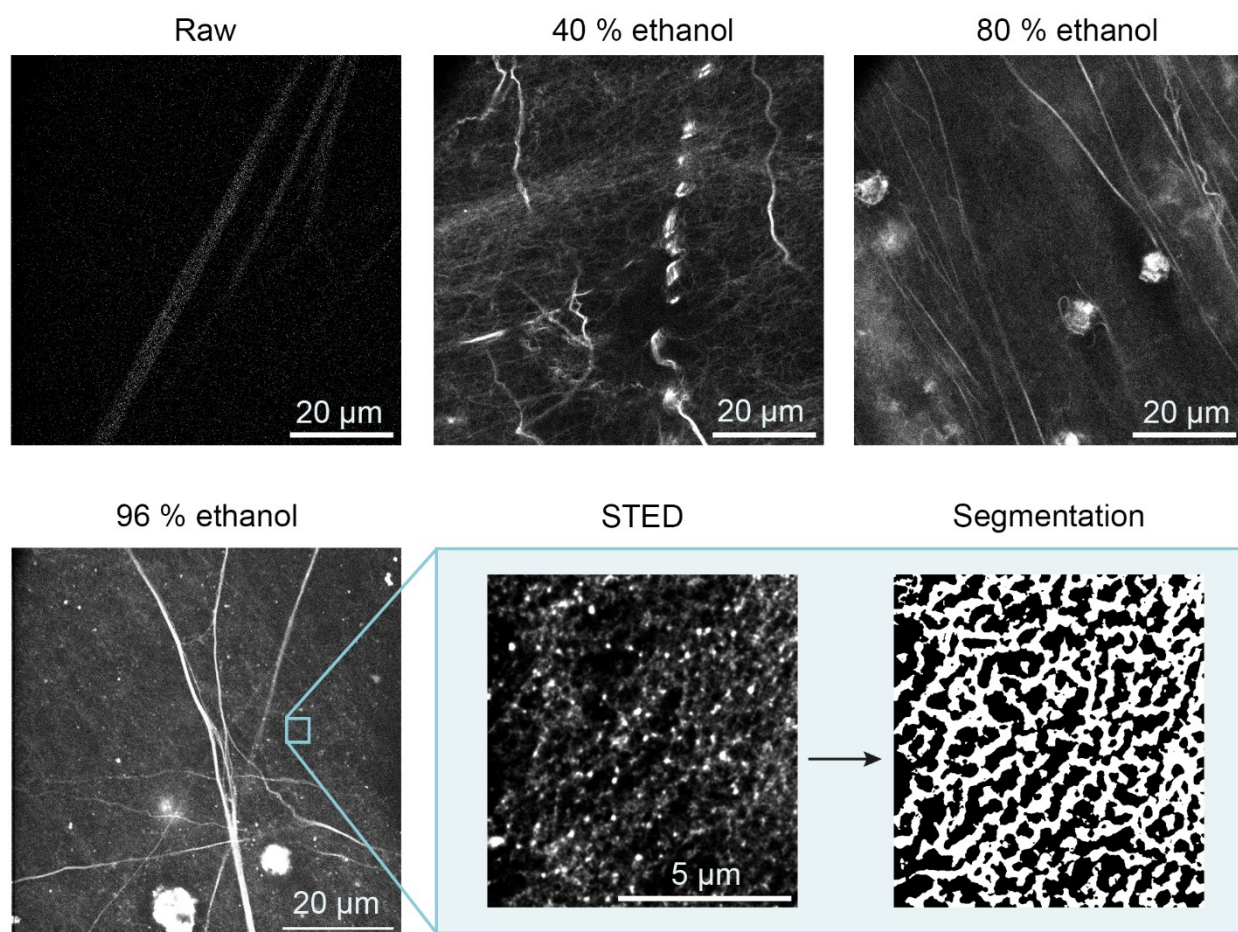

**Fig. S2 Representative confocal overview images of raw jellyfish and ethanol-soaked mesoglea.** From top left: raw mesoglea, 40% ethanol, 80% ethanol. From bottom left: 96% ethanol, zoom for STED imaging, and corresponding segmentation.

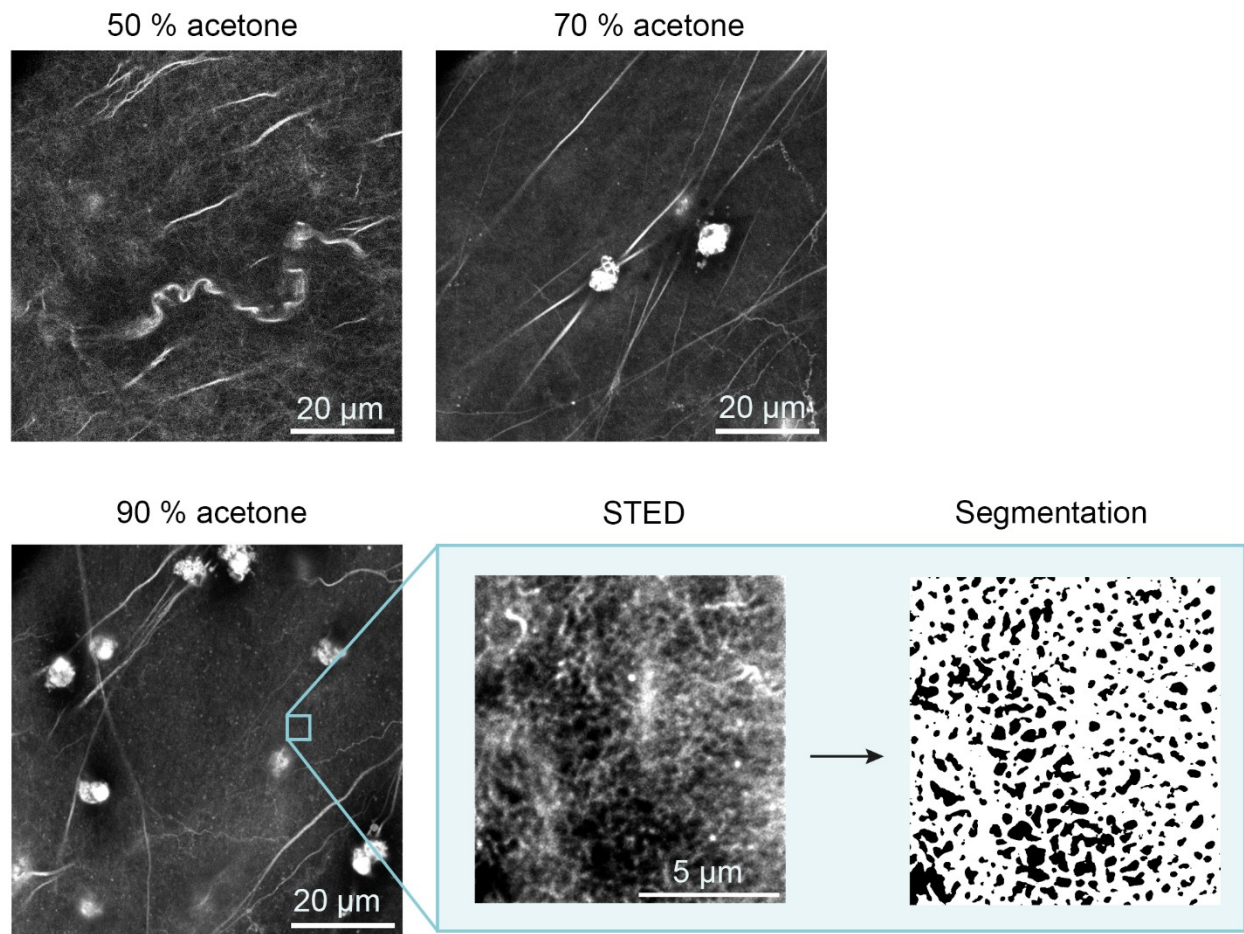

**Fig. S3 Representative confocal overview images of acetone-soaked mesoglea.** From top left: 50% acetone, 70% acetone. From bottom left: 90% acetone, zoom for STED imaging and corresponding segmentation.
